# Supplementary material for: Spatiotemporal Suicide Risk in Germany: A Longitudinal Study 2007–11
Source: PubMed Central journal article supplement (PMC5550498; doi:10.1038/s41598-017-08117-4), 2017-08-09
Supplement: 41598_2017_8117_MOESM1_ESM.pdf [file 41598_2017_8117_MOESM1_ESM.pdf]

## Supplementary Materials

### Spatiotemporal Suicide Risk in Germany: A Longitudinal Study 2007–11

Marco Helbich, Paul L. Plener, Sebastian Hartung, Victor Blüml

#### Specification of space–time regressions

To model contributing risk and protective factors from 2007 to 2011 and to investigate spatiotemporal suicide risk, hierarchical Bayesian models were implemented<sup>1,2</sup>. The application was restricted to the parametric time trend model<sup>3</sup> and the non-parametric dynamic counterpart<sup>1,4</sup> which were found to be superior to more complex models<sup>5,6</sup>.

As suicide is a count, it is valid to assume that these counts arise from a Poisson distribution. Let  $y_{it}$  be the observed suicide cases in area  $i$  ( $i=1,\dots,402$ ) at time  $t$  ( $t=2007,\dots,2011$ ),  $\rho_{it}$  denotes a rate, and  $E_{it}$  represent the expected number of cases<sup>1,2</sup>. Then the implemented mode is expressed as (equation 1):

$$y_{it} = \text{Poisson}(\lambda_{it}) \quad \lambda_{it} = E_{it} \rho_{it} \quad \log(\rho_{it}) = \eta_{it} \quad (1)$$

Model 1a follows Bernardinelli et al. (1995) who proposed the following spatiotemporal model with a parametric linear time trend (equation 2):

$$\eta_{it} = \alpha + \beta_k x_{kt} + v_i + u_i + (\psi + \delta_i) \times t \quad (2)$$

where the intercept  $\alpha$  represents the area-wide relative risk and  $\beta_k$  refers to the regression coefficient of covariate  $k$ . Whereas the covariate income, unemployment rate, and population density is time-varying, the remaining covariates are kept temporally constant. In model 1b, significantly associated linear covariates are replaced through second-order random walks to model non-linear effects<sup>7,8</sup>. To obviate violation of the model assumption of spatial independence, it was of paramount importance to explicitly model area-specific spatial effects; that is, spatially adjacent districts have an associated risk. Here, following Besag et al. (1991),  $v_i$  is a spatially structured residual effect for each district modeled as intrinsic conditional autoregressive specification. An unstructured residual effect  $u_i$

models spatially uncorrelated extra variability provoked by unobserved aspatial variables and is assumed to follow a Gaussian distribution <sup>10</sup>. The smoothed district-specific relative risk compared to entire Germany is  $\zeta_i = \exp(v_i + u_i)$ . Districts are neighbours when a common boundary is shared. Rather than pooling data over time, models 1a and 1b consider temporal dependencies.  $\psi$  represents the grand (i.e., study area-wide) temporal trend, whereas the differential component,  $\delta_i$ , captures district-related temporal deviations modelled as independent and Gaussian distributed random variable. Interpretatively, a differential component below 0 indicates a less pronounced trend than the grand trend, and a value of above 0 refers to a more pronounced trend <sup>2</sup>.

Model 2 relaxes the linearity assumption of the temporal effect in models 1a and 1b by means of a nonparametric dynamic time trend <sup>4</sup> (equation 3):

$$\eta_{it} = \alpha + \beta_k x_{kt} + v_i + u_i + \gamma_t + \phi_t \quad (3)$$

Here, the same parametrization applies as above except that  $\gamma_t$  now refers to a temporally structured effect modelled as second-order random walk and  $\phi_t$  to a temporally unstructured effect. The temporally structured effect aims to resemble the trend of adjacent districts.

Bayesian inference was carried out with the integrated nested Laplace approximation, which is a highly accurate and computationally fast alternative to Markov chain Monte Carlo methods <sup>11</sup>. Although the default prior distributions were specified for the model parameters, the hyperparameters for the spatial effects and random walks were scaled to achieve a less ad hoc selection <sup>12</sup>. For all models, relative risk estimates were obtained based on exponentiating their posterior means together with the 95% credibility intervals (CI) to obtain parameter uncertainty. In order to assess the quality of the models, three statistics were utilized: a) The deviance information criterion (DIC) to judge the goodness-of-fit and to compare candidate models <sup>13</sup>. Lower DIC values denote a better trade-off between a model's performance and its complexity. b) The sum of the logged cross-validation predictive ordinate values (CPO) <sup>14</sup>. Larger scores refer to a better model fit. c) The predictive quality, which was tested through histograms of the probability integral transform (PIT). Uniform distribution of the PIT histogram indicates a well-specified model. CPO and PIT results are available upon request.

Supplementary Table S1. Descriptive statistics.

|                                                       | <b>Min.</b> | <b>1st Qu.</b> | <b>Median</b> | <b>3rd Qu.</b> | <b>Max.</b> |
|-------------------------------------------------------|-------------|----------------|---------------|----------------|-------------|
| <b>Suicides</b>                                       |             |                |               |                |             |
| 2007                                                  | 0           | 12             | 18            | 27             | 433         |
| 2008                                                  | 0           | 12             | 19            | 27             | 350         |
| 2009                                                  | 0           | 12             | 19            | 28             | 286         |
| 2010                                                  | 0           | 13             | 19            | 29             | 368         |
| 2011                                                  | 0           | 13             | 19            | 30             | 353         |
| <b>Population</b>                                     |             |                |               |                |             |
| 2007                                                  | 34,719      | 106,738        | 150,131       | 204,522        | 3,416,255   |
| 2008                                                  | 34,525      | 105,892        | 149,442       | 238,840        | 3,431,675   |
| 2009                                                  | 34,109      | 105,597        | 148,602       | 238,204        | 3,442,675   |
| 2010                                                  | 33,944      | 105,211        | 148,629       | 238,891        | 3,460,725   |
| 2011                                                  | 34,161      | 104,350        | 147,000       | 237,796        | 3,326,002   |
| <b>Income (in €)</b>                                  |             |                |               |                |             |
| 2007                                                  | 19,934      | 23,552         | 25,966        | 27,898         | 38,637      |
| 2008                                                  | 19,892      | 23,770         | 26,537        | 28,520         | 38,715      |
| 2009                                                  | 19,649      | 23,996         | 26,546        | 28,280         | 39,389      |
| 2010                                                  | 20,130      | 24,591         | 27,235        | 29,098         | 39,420      |
| 2011                                                  | 20,573      | 25,370         | 28,000        | 30,080         | 41,864      |
| <b>Population density (people per km<sup>2</sup>)</b> |             |                |               |                |             |
| 2007                                                  | 40          | 117            | 204           | 651            | 4,100       |
| 2008                                                  | 39          | 116            | 203           | 649            | 4,140       |
| 2009                                                  | 39          | 115            | 201           | 649            | 4,150       |
| 2010                                                  | 38          | 114            | 200           | 649            | 4,230       |
| 2011                                                  | 37          | 113            | 196           | 638            | 4,260       |
| <b>Unemployment rate (in %)</b>                       |             |                |               |                |             |
| 2007                                                  | 2.2         | 5.3            | 7.4           | 11.1           | 22.0        |
| 2008                                                  | 1.6         | 4.3            | 6.4           | 9.6            | 19.4        |
| 2009                                                  | 2.2         | 4.9            | 6.9           | 9.9            | 18.0        |
| 2010                                                  | 1.9         | 4.7            | 6.5           | 9.2            | 16.6        |
| 2011                                                  | 1.4         | 4.0            | 5.9           | 8.5            | 16.7        |
| Depression prevalence 2011 (in %)                     | 5.3         | 8.8            | 9.9           | 11.2           | 18.2        |
| General practitioners 2011 (per 100,000 persons)      | 46.1        | 59.3           | 64.0          | 68.2           | 96.6        |
| Psychiatrists 2011 (per 100,000 persons)              | 0.0         | 3.4            | 4.3           | 6.1            | 19.3        |
| Psychotherapists 2011 (per 100,000 persons)           | 1.7         | 10.9           | 16.1          | 24.8           | 129.8       |

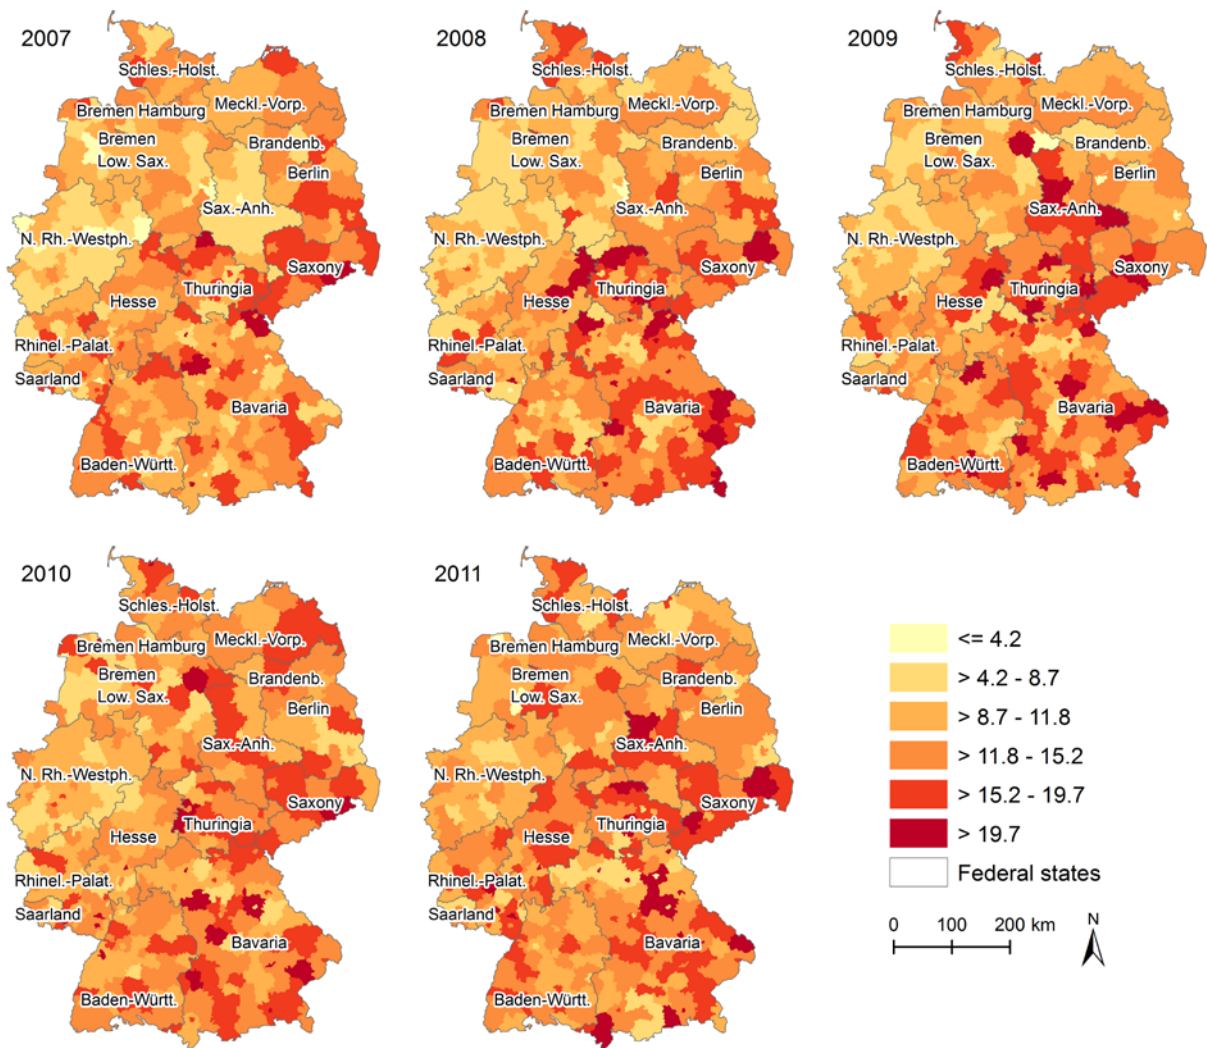

Supplementary Figure S2. Annual suicide rate per 100,000 persons at the district level (2007–11).

Maps were created with ArcGIS 10.4.1 ([www.esri.com](http://www.esri.com)).

Supplementary Table S3. Spearman correlations between the covariates.

| 2007                     | Income | Unemployment rate | Depression prevalence | General practitioners | Psychotherapists | Psychiatrists | Population density (log) |
|--------------------------|--------|-------------------|-----------------------|-----------------------|------------------|---------------|--------------------------|
| Income                   |        | -0.223            | 0.232                 | 0.054                 | 0.144            | 0.176         | 0.179                    |
| Unemployment rate        | 0.000  |                   | -0.260                | -0.189                | 0.178            | 0.023         | 0.098                    |
| Depression prevalence    | 0.000  | 0.000             |                       | 0.479                 | 0.406            | 0.385         | 0.305                    |
| General practitioners    | 0.283  | 0.000             | 0.000                 |                       | 0.472            | 0.436         | 0.218                    |
| Psychotherapists         | 0.004  | 0.000             | 0.000                 | 0.000                 |                  | 0.699         | 0.673                    |
| Psychiatrists            | 0.000  | 0.647             | 0.000                 | 0.000                 | 0.000            |               | 0.688                    |
| Population density (log) | 0.000  | 0.050             | 0.000                 | 0.000                 | 0.000            | 0.000         |                          |
| 2008                     | Income | Unemployment rate | Depression prevalence | General practitioners | Psychotherapists | Psychiatrists | Population density (log) |
| Income                   |        | -0.216            | 0.221                 | 0.049                 | 0.125            | 0.164         | 0.170                    |
| Unemployment rate        | 0.000  |                   | -0.267                | -0.188                | 0.186            | 0.045         | 0.125                    |
| Depression prevalence    | 0.000  | 0.000             |                       | 0.479                 | 0.406            | 0.385         | 0.306                    |
| General practitioners    | 0.327  | 0.000             | 0.000                 |                       | 0.472            | 0.436         | 0.219                    |
| Psychotherapists         | 0.012  | 0.000             | 0.000                 | 0.000                 |                  | 0.699         | 0.673                    |
| Psychiatrists            | 0.001  | 0.372             | 0.000                 | 0.000                 | 0.000            |               | 0.689                    |
| Population density (log) | 0.001  | 0.012             | 0.000                 | 0.000                 | 0.000            | 0.000         |                          |
| 2009                     | Income | Unemployment rate | Depression prevalence | General practitioners | Psychotherapists | Psychiatrists | Population density (log) |
| Income                   |        | -0.228            | 0.231                 | 0.069                 | 0.138            | 0.174         | 0.172                    |
| Unemployment rate        | 0.000  |                   | -0.244                | -0.168                | 0.213            | 0.057         | 0.162                    |
| Depression prevalence    | 0.000  | 0.000             |                       | 0.479                 | 0.406            | 0.385         | 0.306                    |
| General practitioners    | 0.166  | 0.001             | 0.000                 |                       | 0.472            | 0.436         | 0.220                    |
| Psychotherapists         | 0.006  | 0.000             | 0.000                 | 0.000                 |                  | 0.699         | 0.673                    |
| Psychiatrists            | 0.000  | 0.252             | 0.000                 | 0.000                 | 0.000            |               | 0.690                    |
| Population density (log) | 0.001  | 0.001             | 0.000                 | 0.000                 | 0.000            | 0.000         |                          |
| 2010                     | Income | Unemployment rate | Depression prevalence | General practitioners | Psychotherapists | Psychiatrists | Population density (log) |
| Income                   |        | -0.177            | 0.235                 | 0.069                 | 0.140            | 0.180         | 0.177                    |
| Unemployment rate        | 0.000  |                   | -0.227                | -0.181                | 0.233            | 0.084         | 0.212                    |
| Depression prevalence    | 0.000  | 0.000             |                       | 0.479                 | 0.406            | 0.385         | 0.307                    |
| General practitioners    | 0.167  | 0.000             | 0.000                 |                       | 0.472            | 0.436         | 0.221                    |
| Psychotherapists         | 0.005  | 0.000             | 0.000                 | 0.000                 |                  | 0.699         | 0.673                    |
| Psychiatrists            | 0.000  | 0.093             | 0.000                 | 0.000                 | 0.000            |               | 0.691                    |
| Population density (log) | 0.000  | 0.000             | 0.000                 | 0.000                 | 0.000            | 0.000         |                          |
| 2011                     | Income | Unemployment rate | Depression prevalence | General practitioners | Psychotherapists | Psychiatrists | Population density (log) |
| Income                   |        | -0.138            | 0.225                 | 0.061                 | 0.142            | 0.187         | 0.182                    |
| Unemployment rate        | 0.005  |                   | -0.225                | -0.187                | 0.219            | 0.083         | 0.213                    |
| Depression prevalence    | 0.000  | 0.000             |                       | 0.479                 | 0.406            | 0.385         | 0.308                    |
| General practitioners    | 0.224  | 0.000             | 0.000                 |                       | 0.472            | 0.436         | 0.222                    |
| Psychotherapists         | 0.004  | 0.000             | 0.000                 | 0.000                 |                  | 0.699         | 0.674                    |
| Psychiatrists            | 0.000  | 0.095             | 0.000                 | 0.000                 | 0.000            |               | 0.691                    |
| Population density (log) | 0.000  | 0.000             | 0.000                 | 0.000                 | 0.000            | 0.000         |                          |

*P*-values are given in the lower diagonal

Supplementary Table S4. Univariate Moran's  $I$  results.

| Suicide rate           | 2007  | 2008  | 2009  | 2010  | 2011  |
|------------------------|-------|-------|-------|-------|-------|
| Univariate Moran's $I$ | 0.222 | 0.273 | 0.231 | 0.137 | 0.077 |
| $P$ -value             | 1e-04 | 1e-04 | 1e-04 | 2e-04 | 0.009 |

Supplementary Table S5. Bivariate Moran's  $I$  results.

| Suicide rates ( $t, t+1$ ) | 2007-2008 | 2008-2009 | 2009-2010 | 2010-2011 |
|----------------------------|-----------|-----------|-----------|-----------|
| Bivariate Moran's $I$      | 0.191     | 0.258     | 0.240     | 0.121     |
| $P$ -value                 | 1e-04     | 1e-04     | 1e-04     | 1e-04     |

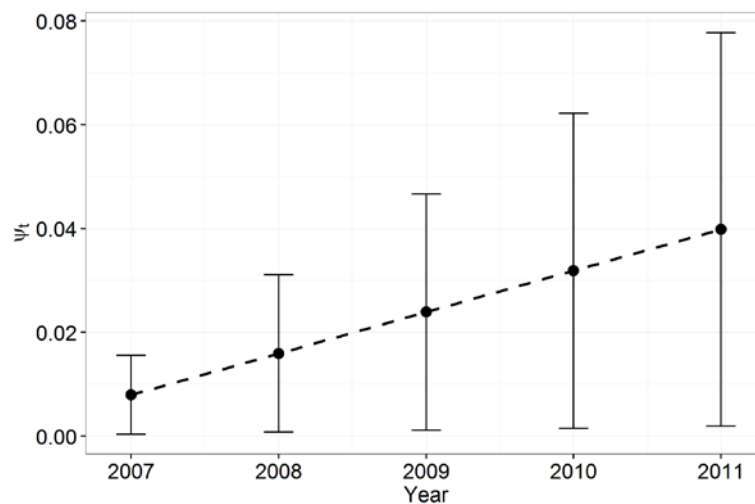

Supplementary Figure S6. Grand temporal trend with 95% credibility intervals.

## References

1. Schrödle, B. & Held, L. Spatio-temporal disease mapping using INLA. *Environmetrics* **22**, 725–734 (2011).
2. Blangiardo, M., Cameletti, M., Baio, G. & Rue, H. Spatial and spatio-temporal models with R-INLA. *Spat. Spatiotemporal. Epidemiol.* **7**, 39–55 (2013).
3. Bernardinelli, L. *et al.* Bayesian analysis of space-time variation in disease risk. *Stat. Med.* **14**, 2433–2443 (1995).
4. Knorr-Held, L. Bayesian modelling of inseparable space-time variation in disease risk. *Stat. Med.* **19**, 2555–2567 (2000).
5. Ugarte, M. D., Goicoa, T., Ibanez, B. & Militino, A. F. Evaluating the performance of spatio-temporal Bayesian models in disease mapping. *Environmetrics* **20**, 647–665 (2009).
6. Kang, S. Y., McGree, J., Baade, P. & Mengersen, K. A case study for modelling cancer incidence using Bayesian spatio-temporal models. *Aust. N. Z. J. Stat.* **57**, 325–345 (2015).

7. Stack, S. Suicide: a 15-year review of the sociological literature part II: Modernization and social integration perspectives. *Suicide Life-Threatening Behav.* **30**, 163–176 (2000).
8. Congdon, P. Assessing the impact of socioeconomic variables on small area variations in suicide outcomes in England. *Int. J. Environ. Res. Public Health* **10**, 158–177 (2012).
9. Besag, J., York, J. & Mollié, A. Bayesian image restoration, with two applications in spatial statistics. *Ann. Inst. Stat. Math.* **43**, 1–20 (1991).
10. Lawson, A. B. *Bayesian disease mapping: hierarchical modeling in spatial epidemiology*. (CRC press, 2013).
11. Rue, H., Martino, S. & Chopin, N. Approximate bayesian inference for latent Gaussian models by using integrated nested Laplace approximations. *J. R. Stat. Soc. Ser. b* **71**, 319–392 (2009).
12. Sørbye, S. H. & Rue, H. Scaling intrinsic Gaussian Markov random field priors in spatial modelling. *Spat. Stat.* **8**, 39–51 (2014).
13. Spiegelhalter, D. J., Best, N. G., Carlin, B. P. & Linde, A. The deviance information criterion: 12 years on. *J. R. Stat. Soc. Ser. B (Statistical Methodol.* **76**, 485–493 (2014).
14. Pettit, L. I. The conditional predictive ordinate for the normal distribution. *J. R. Stat. Soc. Ser. B* 175–184 (1990).
